# Supplementary material for: Stromal fibroblasts derived from mammary gland of bovine with mastitis display inflammation-specific changes
Source: PubMed Central journal article supplement (PMC4895242; doi:10.1038/srep27462), 2016-06-07
Supplement: srep27462-s1.pdf [file srep27462-s1.pdf]

# Stromal fibroblasts derived from mammary gland of bovine with mastitis display inflammation-specific changes

Qing Chen<sup>1\*</sup>, Guiliang He<sup>1\*</sup>, Wenyao Zhang<sup>1</sup>, Tong Xu<sup>1</sup>, Hongliang Qi<sup>1</sup>, Jing Li<sup>1</sup>, Yong Zhang<sup>1,2,\*</sup> & Ming-Qing Gao<sup>1,2,\*</sup>

<sup>1</sup>College of Veterinary Medicine, Northwest A&F University, Yangling 712100, Shaanxi, China

<sup>2</sup>Key Laboratory of Animal Biotechnology, Ministry of Agriculture, Northwest A&F University, Yangling 712100, Shaanxi, China

\*These authors contributed equally to this work.

\*Correspondence and requests for materials should be addressed to M.-Q.G. (email: gaomingqing@nwsuaf.edu.cn) or Y.Z. (email: zhangyong1956@nwsuaf.edu.cn)

Fig S1.

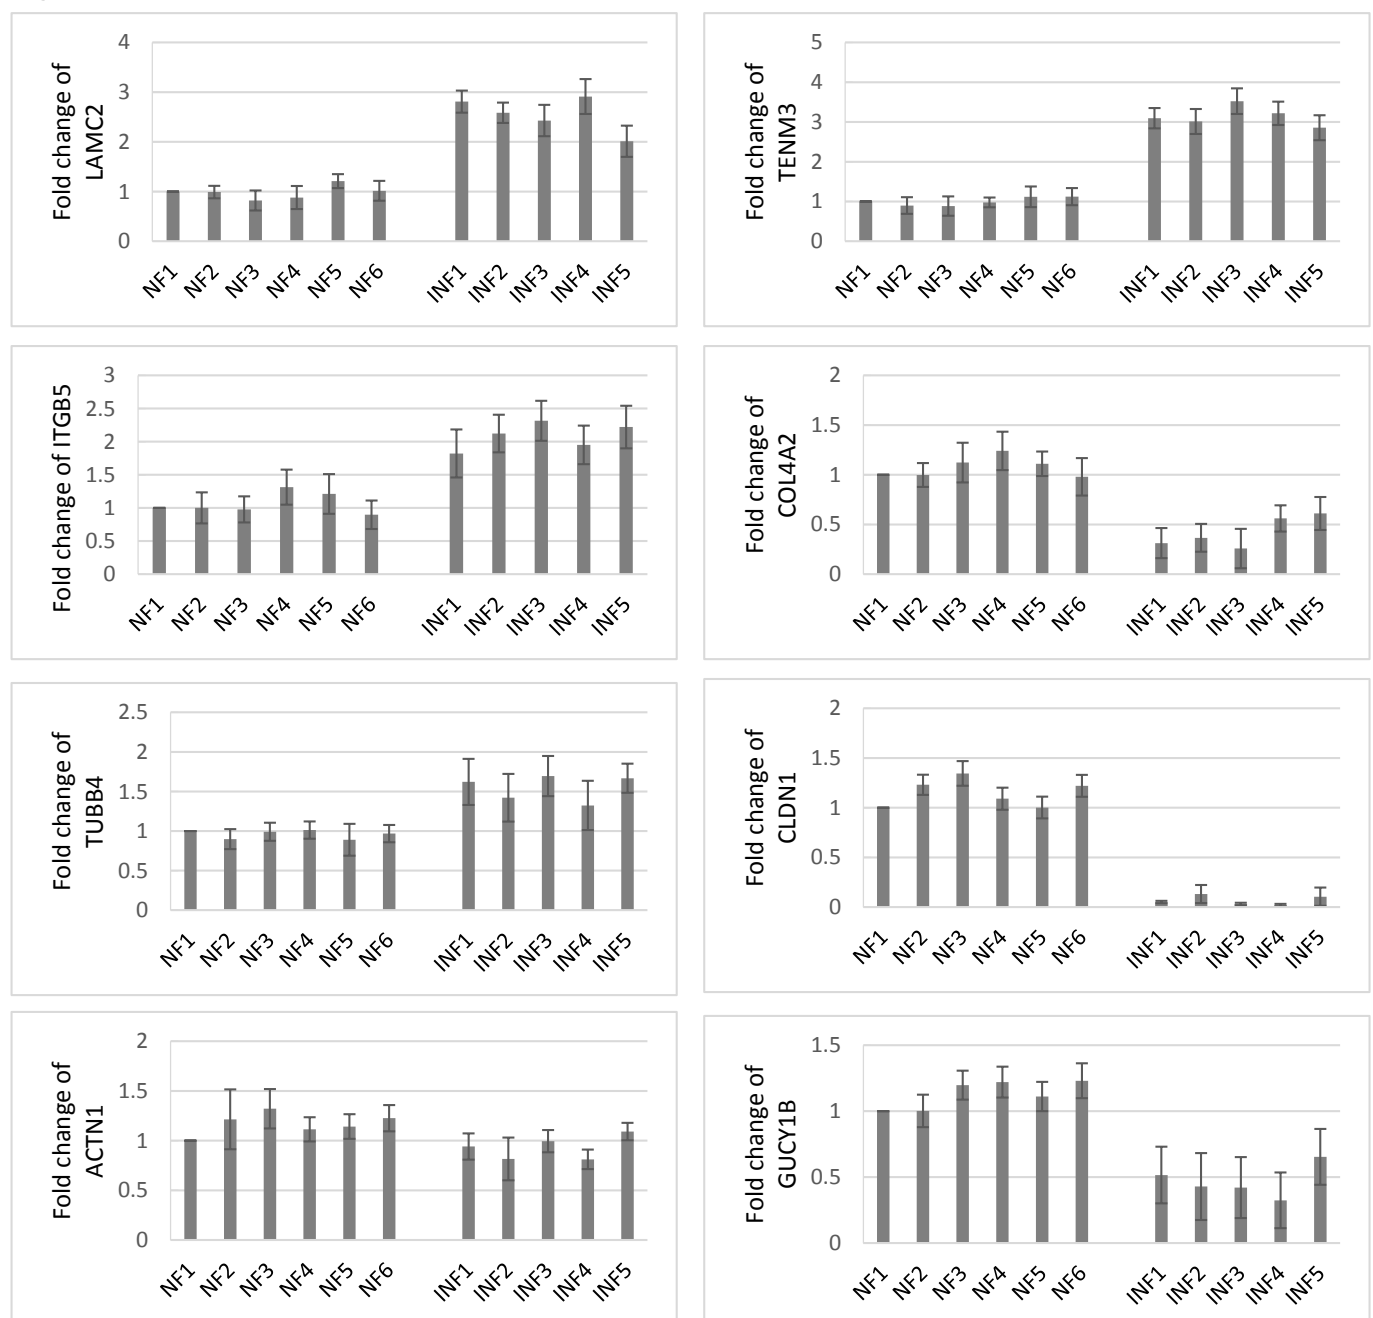

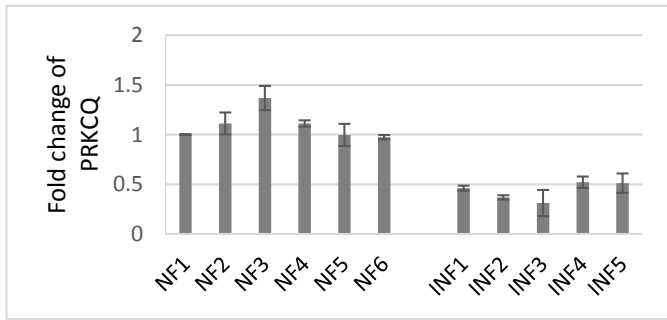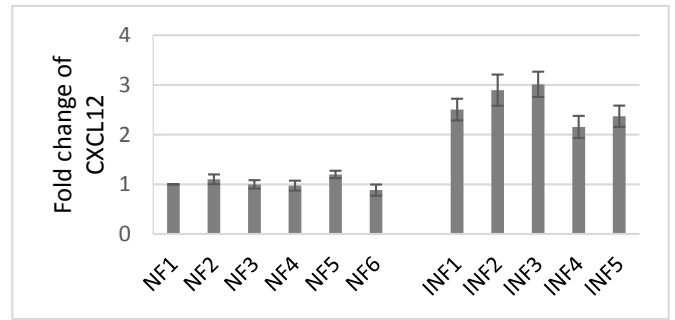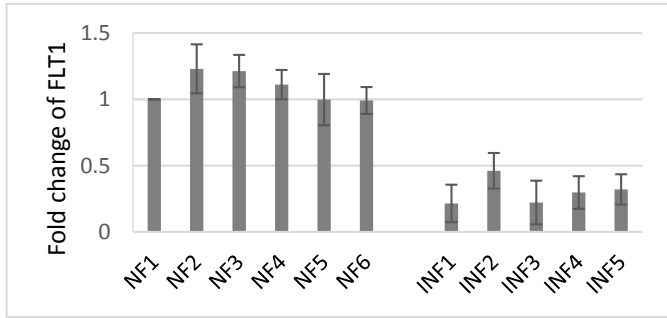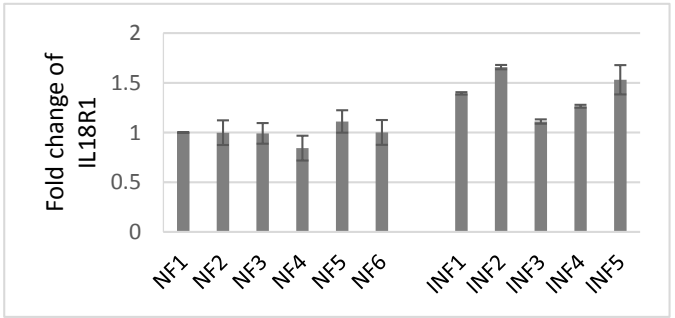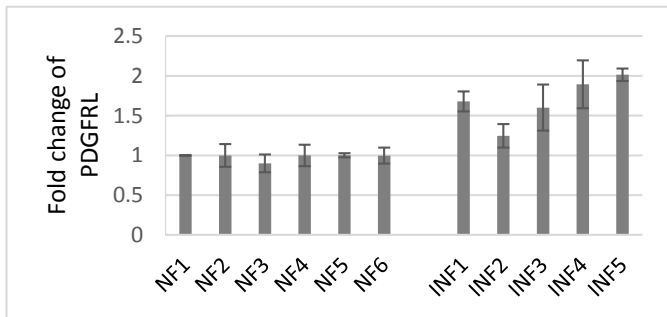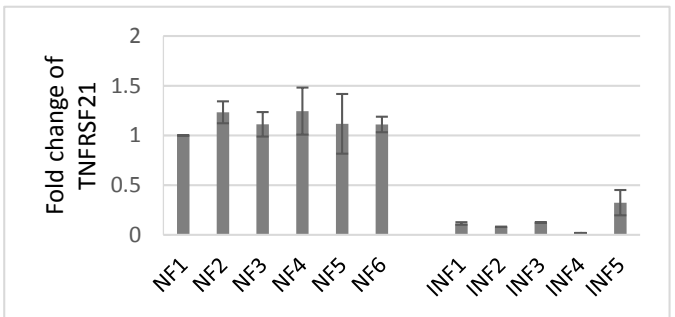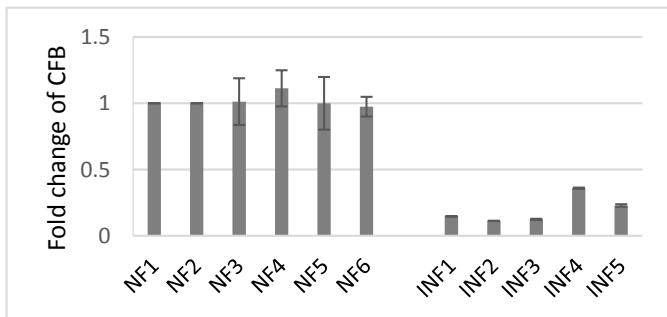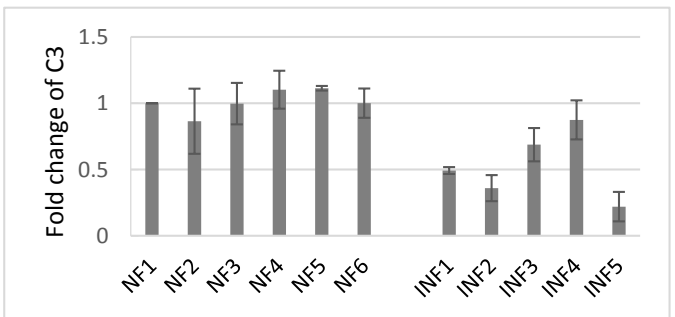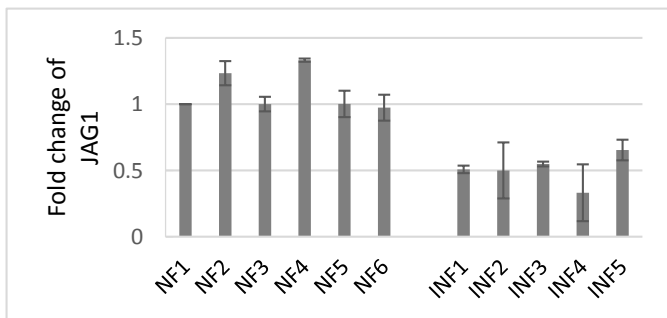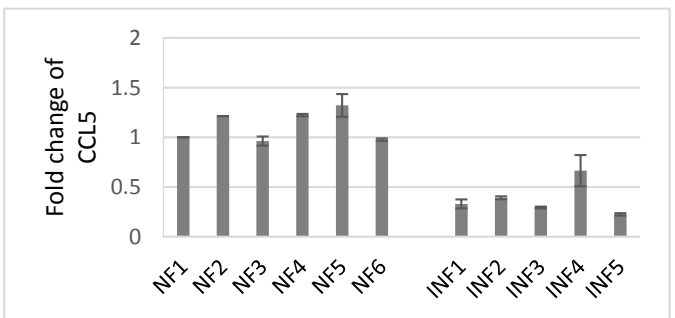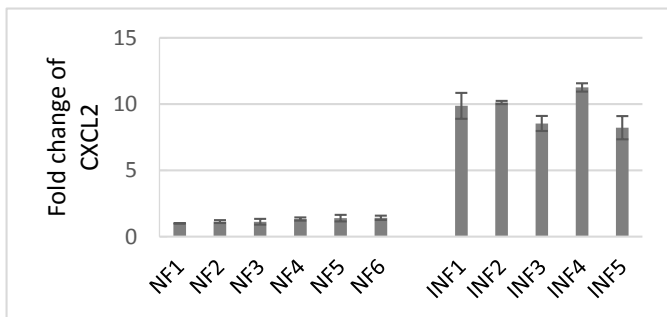

**Fig S1. The expressions of the selected genes in the fibroblasts extracted from each individual were confirmed by real time PCR.** NF1~NF6 and INF1~INF5 refer to the fibroblasts from each individual before mixture into cell pools. The gene expression was normalized to GAPDH and relative to NF1. The expressions of these selected genes were consistent with the results as determined by RNA-Seq. Each sample was measured in triplicate and the data were representative for one of three independently repeated experiments.

**Table S2. List of ECM remodeling-related DEGs in INFs and NFs**

| gene                                                 | gene symbol | log <sub>2</sub> ratio |
|------------------------------------------------------|-------------|------------------------|
| Laminin, alpha 2                                     | LAMA2       | 8.3                    |
| Laminin, gamma 2                                     | LAMC2       | 2.2                    |
| Laminin, alpha 3                                     | LAMA3       | 1.7                    |
| Laminin, alpha 4                                     | LAMA4       | -1.3                   |
| Collagen triple helix repeat-containing protein 1    | CTHRC1      | 1.2                    |
| Collagen, type IV, alpha 1                           | COL4A1      | -2.3                   |
| B-cell CLL/lymphoma 9                                | BCL9        | -1.5                   |
| Collagen, type IV, alpha 2                           | COL4A2      | -1.7                   |
| Collagen, type XI, alpha 1                           | COL11A1     | -1.3                   |
| Fibronectin 1                                        | FN1         | -1.2                   |
| Secreted phosphoprotein 1                            | SPP1        | 1.0                    |
| Teneurin transmembrane protein 3                     | TENM3       | 2.0                    |
| Tenascin XB                                          | TNXB        | 1.5                    |
| Sidekick cell adhesion molecule 1                    | SDK1        | 1.0                    |
| Matrix-remodelling associated 5                      | MXRA5       | 2.5                    |
| Integrin, alpha 8                                    | ITGA8       | -1.2                   |
| Integrin, alpha 9                                    | ITGA9       | 3.5                    |
| Integrin, beta-like 1 (with EGF-like repeat domains) | ITGBL1      | 2.2                    |
| Integrin, beta 5                                     | ITGB5       | 1.2                    |
| Centrosomal protein 85kda                            | CEP85       | -1.0                   |

**Table S3. List of DEGs related cell junction and focal adhesion in INFs and NFs**

| gene                                                                                    | gene symbol  | log <sub>2</sub> ratio |
|-----------------------------------------------------------------------------------------|--------------|------------------------|
| Fer-1-like family member 6                                                              | FER1L6       | 4.1                    |
| Tubulin, beta 4A class Iva                                                              | TUBB4A       | 2.7                    |
| AHNAK nucleoprotein 2                                                                   | AHNAK2       | 2.0                    |
| Major facilitator superfamily domain containing 6                                       | MFSD6        | 1.7                    |
| Platelet derived growth factor C                                                        | PDGFC        | 1.6                    |
| Guanylate cyclase 1, soluble, beta 3                                                    | GUCY1B3      | -2.6                   |
| Phospholipase C, beta 4                                                                 | PLCB4        | -2.3                   |
| Tubulin alpha-1C chain-like                                                             | LOC100141266 | -1.7                   |
| Tubulin, alpha 1b                                                                       | TUBA1B       | -1.3                   |
| Cyclin-dependent kinase 1                                                               | CDK1         | -1.2                   |
| Inositol 1,4,5-trisphosphate receptor, type 1                                           | ITPR1        | -1.1                   |
| Tubulin, beta class I                                                                   | TUBB         | -1.1                   |
| Guanine nucleotide binding protein (G protein), alpha inhibiting activity polypeptide 1 | GNAI1        | -1.1                   |

|                                                                            |          |      |
|----------------------------------------------------------------------------|----------|------|
| Spectrin repeat containing, nuclear envelope family member 3               | SYNE3    | 1.8  |
| Angiomotin                                                                 | AMOT     | 1.7  |
| Par-3 family cell polarity regulator beta                                  | PARD3B   | 1.6  |
| EH domain binding protein 1                                                | EHBP1    | 1.4  |
| Neuron navigator 2                                                         | NAV2     | 1.3  |
| Zinc finger, BED-type containing 5                                         | ZBED5    | 1.2  |
| Elastin microfibril interfacier 2                                          | EMILIN2  | 1.2  |
| Uveal autoantigen with coiled-coil domains and ankyrin repeats             | UACA     | 1.1  |
| Protein kinase C, theta                                                    | PRKCQ    | -4.8 |
| Claudin 1                                                                  | CLDN1    | -4.3 |
| myosin, heavy chain 6, cardiac muscle, alpha                               | MYH6     | -2.7 |
| KIAA1524 ortholog                                                          | KIAA1524 | -1.8 |
| Calcium/calmodulin-dependent serine protein kinase (MAGUK family)          | CASK     | -1.7 |
| SH3 and cysteine rich domain                                               | STAC     | -1.6 |
| Tuftelin 1                                                                 | TUFT1    | -1.3 |
| Spindle apparatus coiled-coil protein 1                                    | SPDL1    | -1.1 |
| Cingulin                                                                   | CGN      | -1.1 |
| Muscle RAS oncogene homolog                                                | MRAS     | -1.1 |
| Microtubule associated monooxygenase, calponin and LIM domain containing 3 | MICAL3   | -1.1 |
| Sperm antigen with calponin homology and coiled-coil domains 1             | SPECC1   | -1.0 |
| Microtubule associated monooxygenase, calponin and LIM domain containing 2 | MICAL-2  | -1.0 |
| Actinin, alpha 1                                                           | ACTN1    | -1.0 |
| WW and C2 domain containing 1                                              | WWC1     | -1.0 |
| F-box protein 20                                                           | Fbp20    | 4.7  |
| BAI1-associated protein 2                                                  | BAIAP2   | 1.7  |
| Pleckstrin homology domain containing, family A member 5                   | PLEKHA5  | 1.2  |
| Transcription factor 7-like 2 (T-cell specific, HMG-box)                   | TCF7L2   | 1.0  |
| Calponin 1, basic, smooth muscle                                           | CNN1     | -1.3 |
| Synovial sarcoma, X breakpoint 2 interacting protein                       | SSX2IP   | -1.0 |

**Table S4. List of immune-related DEGs in INFs and NFs**

| gene                                                    | gene symbol | log <sub>2</sub> ratio |
|---------------------------------------------------------|-------------|------------------------|
| Phosphoinositide-3-kinase, regulatory subunit 1 (alpha) | PIK3R1      | 1.3                    |
| Inhibin, beta A                                         | INHBA       | -1.1                   |
| Transforming growth factor, beta 2                      | TGFB2       | -1.9                   |
| Secreted frizzled-related protein 1                     | SFRP1       | 1.7                    |
| Follistatin-like 3 (secreted glycoprotein)              | FSTL3       | -1.8                   |
| Wingless-type MMTV integration site family, member 5A   | WNT5A       | -1.1                   |
| Protein kinase C, theta                                 | PRKCQ       | -4.8                   |
| Collectin sub-family member 12                          | COLEC12     | -1.8                   |
| Complement factor B                                     | CFB         | -3.6                   |
| Caveolin 1, caveolae protein, 22kda                     | CAV1        | 1.5                    |
| Glycerol-3-phosphate acyltransferase, mitochondrial     | GPAM        | -1.1                   |
| Activin A receptor, type IIA                            | ACVR2A      | -1.1                   |

|                                                           |           |      |
|-----------------------------------------------------------|-----------|------|
| Complement component 3                                    | C3        | -2.2 |
| Cyclin-dependent kinase 1                                 | CDK1      | -1.2 |
| Scinderin                                                 | SCIN      | 2.7  |
| Fas cell surface death receptor                           | FAS       | 1.3  |
| Pentraxin 3, long                                         | PTX3      | -3.9 |
| Tubulin, beta class I                                     | TUBB      | -1.1 |
| Interferon regulatory factor 1                            | IRF1      | 1.1  |
| Cyclin-dependent kinase inhibitor 2B (p15, inhibits CDK4) | CDKN2B    | -1.0 |
| Chromodomain helicase DNA binding protein 7               | CHD7      | -1.1 |
| Jagged 1                                                  | JAG1      | -2.3 |
| Bone morphogenetic protein 4                              | BMP4      | 1.4  |
| Transforming, acidic coiled-coil containing protein 3     | TACC3     | -1.2 |
| Histone deacetylase 9                                     | HDAC9     | 2.8  |
| Ephrin-B1                                                 | EFNB1     | -1.1 |
| Chemokine (C-X-C motif) ligand 2                          | CXCL2     | 1.1  |
| Chemokine (C-C motif) ligand 5                            | CCL5      | -2.4 |
| Description: chemokine (C-X-C motif) ligand 12            | CXCL12    | 3.6  |
| Nucleoporin 85kda                                         | NUP85     | -1.1 |
| Chemokine (C-X-C motif) ligand 8                          | CXCL8     | -1.8 |
| Major histocompatibility complex, class I                 | LOC512672 | 1.4  |
| Description: notch 1                                      | NOTCH1    | -1.1 |
| Tumor necrosis factor (ligand) superfamily, member 9      | TNFSF9    | 1.6  |
| Platelet-derived growth factor receptor-like              | PDGFRL    | 2.3  |
| Fms-related tyrosine kinase 1                             | FLT1      | -3.8 |
| Tumor necrosis factor receptor superfamily, member 21     | TNFRSF21  | -2.3 |
| Bone morphogenetic protein receptor, type IB              | BMPR1B    | -1.1 |
| Interleukin 18 receptor 1                                 | IL18R1    | -1.6 |

**Table S5. GO functional enrichment analysis of unique genes in INFs**

| <b>Gene Ontology term</b>                | <b>Cluster frequency*</b> | <b>Genome frequency of use</b> | <b>Corrected P-value</b> |
|------------------------------------------|---------------------------|--------------------------------|--------------------------|
| <b>Terms from the Component Ontology</b> |                           |                                |                          |
| ribonucleoprotein granule                | 3/339                     | 5/10103                        | 0.04878                  |
| cytoplasmic ribonucleoprotein granule    | 3/339                     | 5/10103                        | 0.04878                  |
| P granule                                | 3/339                     | 5/10103                        | 0.04878                  |
| pole plasm                               | 3/339                     | 5/10103                        | 0.04878                  |
| germ plasm                               | 3/339                     | 5/10103                        | 0.04878                  |
| <b>Terms from the Function Ontology</b>  |                           |                                |                          |
| None                                     | 4 /422                    | 6 /9897                        | 0.00945                  |
| <b>Terms from the Process Ontology</b>   |                           |                                |                          |
| DNA recombination                        | 18 /338                   | 132/9543                       | 0.00067                  |

\*Cluster frequency: the denominator represents the total number of genes with GO annotation and the numerator represents the number of each GO term genes. Genome frequency of use: the denominator represents the number of reference genes with GO annotation and the numerator represents the number of reference genes annotated in the listed GO term. Corrected P-value: P-value in hypergeometric test after correction. None: no gene enriched for the terms under the criteria of corrected p-value $\leq$ 0.05.

**Table S6. GO functional enrichment analysis of unique genes in NFs**

| Gene Ontology term                          | Cluster frequency* | Genome frequency of use | Corrected P-value |
|---------------------------------------------|--------------------|-------------------------|-------------------|
| <b>Terms from the Component Ontology</b>    |                    |                         |                   |
| None                                        |                    |                         |                   |
| <b>Terms from the Function Ontology</b>     |                    |                         |                   |
| G-protein coupled peptide receptor activity | 10 /311            | 82/ 9897                | 0.04070           |
| <b>Terms from the Process Ontology</b>      |                    |                         |                   |
| None                                        |                    |                         |                   |

\*Cluster frequency: the denominator represents the total number of genes with GO annotation and the numerator represents the number of each GO term genes. Genome frequency of use: the denominator represents the number of reference genes with GO annotation and the numerator represents the number of reference genes annotated in the listed GO term. Corrected P-value: P-value in hypergeometric test after correction. None: no gene enriched for the terms under the criteria of corrected p-value $\leq$ 0.05.

**Table S7. The enriched pathways of unique genes in NFs and INFs**

| Group | Pathway            | DEGs with pathway annotation | P value  | Q value*   | Pathway ID |
|-------|--------------------|------------------------------|----------|------------|------------|
| NFs   | Lysine degradation | 18 (3.27%)                   | 3.87E-05 | 0.004687   | ko00310    |
|       | Ribosome           | 26 (4.72%)                   | 4.34E-05 | 0.004687   | ko00310    |
| INFs  | Lysine degradation | 19 (3.08%)                   | 5.20E-05 | 0.01122679 | ko00310    |

\* Pathways with a Q value $\leq$ 0.05 were considered significantly enriched.

**Table S8. A list of all primers used in this study**

| Target   | Sequence(5'-3')                 |                                |
|----------|---------------------------------|--------------------------------|
| LAMC2    | F:5'-ATCACAGCTCCCTTGATGCC-3'    | R:5'-TCGAGGTACCCAGTGCTGTA-3'   |
| TENM3    | F:5'-TGTGACCCTAATTGGACTGGC-3'   | R:5'-TCCAAATAGTGAGCGATGGTGC-3' |
| ITGB5    | F:5'-CGTACAACAGCATCCGGTCT-3'    | R:5'-TAGGATACACCGTCCCTGGCA-3'  |
| COL4A1   | F:5'-CAGGTCCCAAAGTTTCCCA-3'     | R:5'-GATTCCATTTGTGTGGCCCG-3'   |
| TUBB4    | F:5'-CATTGATCCCACGGGCACATA-3'   | R:5'-CTCCAGACTGGCCAAACACAA-3'  |
| CLDN1    | F:5'-CCGGTCAATGCCAGGTATGAA-3'   | R:5'-GTCAGCTTTCGCTTCTGTGTC-3'  |
| ACTN1    | F:5'-CCACTTTGACCGGGATCACT-3'    | R:5'-CGGCCAGGATCTTGAAGGAA-3'   |
| GUCY1B1  | F:5'-GGCGCTGACACCATGTAT-3'      | R:5'-CAGCGTTGAGATTGAGGACC-3'   |
| PRKCQ    | F:5'-CACGTTCCAGACCAAGGAGA-3'    | R:5'-CCTTGCACATCCCGAAGTCT-3'   |
| CXCL12   | F:5'-CTCCCTCAGATCGTGGCAA-3'     | R:5'-CCGCACCTTTGCCCTTTTATC-3'  |
| FLT1     | F:5'-TCATTAGAGATCAGGAAGCACCC-3' | R:5'-GCTTTGCAGTGATACACGCC-3'   |
| IL18R1   | F:5'-CCCCTTCTGAAGAGAAGCCA-3'    | R:5'-TCAGGTCAACAGGTCCATGC-3'   |
| PDGFRL   | F:5'-AAGCCCTGGAGGATGTTACTG-3'   | R:5'-CTTTGGCGTTGGATCAGCAG-3'   |
| TNFRSF21 | F:5'-GGCTTCTTCGTGGATGAGTCT-3'   | R:5'-GGTTCAGGATGTGGAGCATGT-3'  |
| CFB      | F:5'-CGCTTCATTCAAGTTGGCGT-3'    | R:5'-TTGGTCTCATGCCCTTTCC-3'    |

---

|               |                                |                                 |
|---------------|--------------------------------|---------------------------------|
| C3            | F:5'-ACCCGGATAAAGAGGACGGA-3'   | R:5'-GTCCGAGCCCGATTTGATGA-3'    |
| JAG1          | F:5'-CCCCTGCGAAGTGATTGACA-3'   | R:5'-GGGTTGCTCTCACAGTCGTT-3'    |
| CCL5          | F:5'-TTTGCTATATCTCCCGCCC3'     | R:5'-TGGTGATAAAGACAACGCTGC-3'   |
| CXCL2         | F:5'-CCGAAGTCATAGCCACTCTC-3'   | R:5'-TTCTGTAGGGGCAGGGTCTA-3'    |
| IL6           | F:5'-ACTCCATTCGCTGTCTCCCTG-3'  | R:5'-TCGCCTGATTGAACCCAGATTG-3'  |
| IL8           | F:5'-ATGACTTCCAAGCTGGCTGTTG-3' | R:5'-TTTCATGGATCTTGCTTCTCAGC-3' |
| TNF- $\alpha$ | F:5'-TCCAGAAGTTGCTTGTGCCT-3'   | R:5'-GTTGATGTCGGCTACAACGTG-3'   |
| GAPDH         | F:5'-ACGGCACAGTCAAGGCAGA-3'    | R:5'-GTGATGGCGTGGACAGTGG-3'     |

---
